# Supplementary material for: Tracking ‘transitional’ diadectomorphs in the earliest Permian of equatorial Pangea
Source: PeerJ. 2023 Dec 6;11:e16603. doi: 10.7717/peerj.16603 (PMC10710172; doi:10.7717/peerj.16603)
Supplement: Supplemental Information 1 — See the main text for abbreviations. [file peerj-11-16603-s001.xlsx]

## Sheet: Data
Ichnotaxon	Locality		Specimen	Sp	Sm	Pp	Pm	Dpm	Gp	Gm	GAD	Pap	Pam	Oap	Oam	pI	pII	pIII	pIV	pV	mI	mII	mIII	mIV	mV	pL	mL	pL	pIV	Sp/pL	Pp/pL	Gp/pL	(Gp-Gm)/pL	GAD/pL	Dpm/pL	Pap	Pam	Oap	Oam	Oam-Oap		zSp	zSm	zPp	zPm	zDpm	zGp	zGm	zGAD
Ichniotherium praesidentis	BochumFm, Germany	Moscovian	DBM 060003309001-4	430.67	428.67	422.95	410.53	265.32	363.26	346.26	480.65	60.94	63.56	-28	-5.11	34.67	49.75	67.13	86.36	70	24.07	34.73	41.56	44.5	28.93	150.33	109.79	150.33	86.36	2.86483	2.81348	2.41642	0.113085	3.1973	1.76492	60.94	63.56	-28	-5.11	22.89		0.820527	0.797303	2.91711	2.77589	3.7245	3.63408	3.47675	3.09163
Ichniotherium sphaerodactylum	Thuringian Forest, Germany	Sakmarian-Artinskian	BGR-P-12539-F1	332.7	338.7	221	230.3	125.6	151.3	157	285	91.7	89.3	11.6	23.6	19.3	32	40.5	44.5	35.7	17.7	27.3	32.4	37.4	24.6	92.5	77.3	92.5	44.5	3.59676	2.38919	1.63568	-0.0616216	3.08108	1.35784	91.7	89.3	11.6	23.6	12		-0.459839	-0.432876	-0.64614	-0.447787	0.45189	-0.517087	-0.287519	-0.105923
Ichniotherium sphaerodactylum	Thuringian Forest, Germany	Sakmarian-Artinskian	BGR-P-12539-F2	316	319	225	209	96.6	158	135.3	255.3	85.7	100	?	26.3	19	29.3	40.7	46.7	36.5	15.5	27.5	35	42.3	28	90	71.3	90	46.7	3.51111	2.5	1.75556	0.252222	2.83667	1.07333	85.7	100	?	26.3	?		-0.67809	-0.702239	-0.575564	-0.828769	-0.227366	-0.38587	-0.71912	-0.591317
Ichniotherium sphaerodactylum	Thuringian Forest, Germany	Sakmarian-Artinskian	BUW-1	350.3	344	251.9	233.3	141.4	180.3	155.2	321	88.2	98.6	6	74.5	14	28	44	46	40	19.5	27	27	34	20	116	80.5	116	46	3.01983	2.17155	1.55431	0.216379	2.76724	1.21897	88.2	98.6	6	74.5	68.5		-0.229825	-0.360408	-0.100934	-0.394127	0.821967	0.0508688	-0.32332	0.482434
Ichniotherium sphaerodactylum	Thuringian Forest, Germany	Sakmarian-Artinskian	BUW-2-F1	301.5	318.5	207	221.3	115.3	142	166	269	92.5	84	9	17	?	?	38	47	40	20	23	33	36	23	91.3	75.7	91.3	47	3.3023	2.26725	1.55531	-0.26287	2.94633	1.26287	92.5	84	9	17	8		-0.86759	-0.709075	-0.89316	-0.608765	0.210637	-0.699225	-0.108515	-0.367415
Ichniotherium sphaerodactylum	Thuringian Forest, Germany	Sakmarian-Artinskian	BUW-2-F2	309	330	231	232.5	122.3	171	162.5	278	84	90	20	23.7	28	33	41	46	36	17	24	30.7	36.3	23.7	91	75.7	91	46	3.3956	2.53846	1.87912	0.0934066	3.05495	1.34396	84	90	20	23.7	3.7		-0.769573	-0.551833	-0.469698	-0.408436	0.374595	-0.131269	-0.178128	-0.220326
Ichniotherium sphaerodactylum	Thuringian Forest, Germany	Sakmarian-Artinskian	FG-525	384.3	372.5	270.8	261.7	130	194.5	181.3	328	90	97	10.4	18.8	23	38.3	50.5	57.3	44.5	17	27.5	43	49	36	123.3	98	123.3	57.3	3.11679	2.19627	1.57745	0.107056	2.66018	1.05434	90	97	10.4	18.8	8.4		0.214519	0.0292786	0.232542	0.113849	0.554949	0.328972	0.195793	0.596836
Ichniotherium sphaerodactylum	Thuringian Forest, Germany	Sakmarian-Artinskian	HF-51	351.3	357.4	266.1	265	88.4	183.4	187.8	272.5	85.3	84	12	21.1	22	36	43.7	51.5	38.2	17	30.4	37.1	40.4	27	101.8	79.3	101.8	51.5	3.45088	2.61395	1.80157	-0.043222	2.67682	0.868369	85.3	84	12	21.1	9.1		-0.216756	-0.177187	0.149614	0.172874	-0.419431	0.111581	0.325075	-0.310213
Ichniotherium sphaerodactylum	Thuringian Forest, Germany	Sakmarian-Artinskian	HF-55	348	355.7	228.3	228.8	101.5	152.7	132	274	95	100.7	12.5	21.4	20	34	43.5	47.7	37	15	27	37	43.3	29	97.5	86.7	97.5	47.7	3.56923	2.34154	1.56615	0.212308	2.81026	1.04103	95	100.7	12.5	21.4	8.9		-0.259884	-0.200431	-0.517338	-0.474616	-0.112595	-0.489669	-0.784755	-0.285698
Ichniotherium sphaerodactylum	Thuringian Forest, Germany	Sakmarian-Artinskian	HF-56	342	336.3	232	216.3	124.8	153.3	134	287.5	87.5	98.7	0.3	19.4	23.3	34.3	41.7	39.3	39.3	16.4	28.3	37.6	41.4	30.5	110.3	81.5	110.3	39.3	3.10063	2.10335	1.38985	0.174977	2.60653	1.13146	87.5	98.7	0.3	19.4	19.1		-0.338298	-0.465692	-0.452054	-0.698197	0.433152	-0.477918	-0.744976	-0.0650648
Ichniotherium sphaerodactylum	Thuringian Forest, Germany	Sakmarian-Artinskian	HLMD-WT-297	352.3	349	228.5	224.8	81	144.8	142.6	256.3	100	100	14.2	25	17.7	31.2	39.2	45.4	38	17.8	26	32	37	25.4	88.4	67	88.4	45.4	3.98529	2.58484	1.63801	0.0248869	2.89932	0.91629	100	100	14.2	25	10.8		-0.203687	-0.292042	-0.513809	-0.546162	-0.592759	-0.644388	-0.573927	-0.574974
Ichniotherium sphaerodactylum	Thuringian Forest, Germany	Sakmarian-Artinskian	LMJG-8491	352.7	335.5	264.3	240.5	137.8	198.5	159.5	314	85	92	11	26.8	18.5	29	37	45.5	38.5	21.7	28.3	33	36.7	23.3	105.3	83	105.3	45.5	3.34948	2.50997	1.88509	0.37037	2.98196	1.30864	85	92	11	26.8	15.8		-0.19846	-0.476631	0.117855	-0.265344	0.737645	0.40731	-0.237796	0.368031
Ichniotherium sphaerodactylum	Thuringian Forest, Germany	Sakmarian-Artinskian	MB.ICV.1	318.3	316.7	255.1	250.9	140.1	202.7	187.4	297.8	76.7	79.5	2.1	17.8	25.5	36.5	44	56.3	40.5	16.7	33.3	36	37	25	109.5	93.3	109.5	56.3	2.90685	2.32968	1.85114	0.139726	2.71963	1.27945	76.7	79.5	2.1	17.8	15.7		-0.648032	-0.733687	-0.0444721	-0.0793251	0.791517	0.489566	0.317119	0.10327
Ichniotherium sphaerodactylum	Thuringian Forest, Germany	Sakmarian-Artinskian	MB.ICV.2	290	296.7	221.8	208	130.4	151.3	155.3	274.5	82.7	86.5	-11.5	11.2	20.3	33	41.8	46	36.5	18	28	35	38.7	23.7	92	74	92	46	3.15217	2.41087	1.64457	-0.0434783	2.9837	1.41739	82.7	86.5	-11.5	11.2	22.7		-1.01788	-1.00715	-0.632025	-0.846655	0.564318	-0.517087	-0.321331	-0.277527
Ichniotherium sphaerodactylum	Thuringian Forest, Germany	Sakmarian-Artinskian	MB.ICV.4	367	367	242.2	253.4	87.4	159.2	178.4	272	98.8	93.5	12.4	33.1	20.5	29.4	37.4	42.6	32.8	16.3	26.7	31.5	35.7	23.3	94.7	73.2	94.7	42.6	3.8754	2.55755	1.6811	-0.202746	2.87223	0.922914	98.8	93.5	12.4	33.1	20.7		-0.0115735	-0.0459241	-0.272083	-0.0346089	-0.442854	-0.362368	0.138114	-0.318385
Ichniotherium sphaerodactylum	Thuringian Forest, Germany	Sakmarian-Artinskian	MNG-1351	360.1	351.2	240.1	237.9	126.4	160.3	165.6	299.5	96.4	95.2	12	24.8	22.7	33.2	43.6	51.3	38.7	19	28.6	36.6	45.3	28.4	108.5	87	108.5	51.3	3.31889	2.2129	1.47742	-0.0488479	2.76037	1.16498	96.4	95.2	12	24.8	12.8		-0.101749	-0.261961	-0.309136	-0.311849	0.470628	-0.340825	-0.11647	0.131054
Ichniotherium sphaerodactylum	Thuringian Forest, Germany	Sakmarian-Artinskian	MNG-1515-F1	313.5	338.4	252.3	239.1	103.3	195.7	176.1	270.9	77.2	88.4	2.5	30.2	22	32.3	42.8	49.2	42	19.4	31.1	36	39.8	25	96.7	79.1	96.7	49.2	3.24199	2.6091	2.02378	0.202689	2.80145	1.06825	77.2	88.4	2.5	30.2	27.7		-0.710763	-0.436978	-0.093876	-0.290386	-0.0704346	0.352473	0.0923684	-0.336363
Ichniotherium sphaerodactylum	Thuringian Forest, Germany	Sakmarian-Artinskian	MNG-1515-F2	340.6	339.9	228	235.6	94.9	148.9	164.7	268.7	96.6	92	5.1	20.4	?	33	45	49	?	20	29	35.9	40.8	25.5	93.5	73	93.5	49	3.64278	2.4385	1.59251	-0.168984	2.8738	1.01497	96.6	92	5.1	20.4	15.3		-0.356594	-0.416468	-0.522631	-0.352988	-0.267184	-0.564091	-0.134371	-0.372318
Ichniotherium sphaerodactylum	Thuringian Forest, Germany	Sakmarian-Artinskian	MNG-1515-F3	394.1	407.4	258.1	265.1	73.3	170.4	172.9	277.3	98.4	100.7	9.4	22.7	17	32	41.6	45.3	38.5	?	28.9	36.5	41	26.4	100.3	84	100.3	45.3	3.92921	2.57328	1.6989	-0.0249252	2.76471	0.730808	98.4	100.7	9.4	22.7	13.3		0.342595	0.506474	0.00846055	0.174663	-0.773113	-0.14302	0.0287223	-0.231766
Ichniotherium sphaerodactylum	Thuringian Forest, Germany	Sakmarian-Artinskian	MNG-1515-F4	374.7	379.2	243.4	254.7	91.1	155.8	171.7	281.8	101.4	95	13.5	32.2	19	34.3	41.8	48.7	39	19.5	30	35.3	39.8	26.5	94.7	?	94.7	48.7	3.95671	2.57022	1.6452	-0.167899	2.97571	0.961985	101.4	95	13.5	32.2	18.7		0.0890575	0.120889	-0.25091	-0.0113565	-0.35619	-0.428956	0.00485497	-0.158221
Ichniotherium sphaerodactylum	Thuringian Forest, Germany	Sakmarian-Artinskian	MNG-1840-F1	324.7	327	249.5	238.2	112.1	192.2	174.2	272.2	81	88.2	5.6	24.5	25.7	36.1	43	49.9	36.4	24.1	30.3	35.1	38.8	26.2	100.6	79.3	100.6	49.9	3.22763	2.48012	1.91054	0.178926	2.70577	1.11431	81	88.2	5.6	24.5	18.9		-0.56439	-0.592853	-0.14328	-0.306483	0.135684	0.283927	0.0545785	-0.315116
Ichniotherium sphaerodactylum	Thuringian Forest, Germany	Sakmarian-Artinskian	MNG-1840-F2	430.8	438.3	288.8	309.8	113.5	194.8	219.6	328.8	93.5	87.5	16.8	24	28.3	39.3	50.5	59.8	50	18	35	45.4	51.2	35.5	111	88	111	59.8	3.88108	2.6018	1.75495	-0.223423	2.96216	1.02252	93.5	87.5	16.8	24	7.2		0.822226	0.928977	0.550138	0.974189	0.168476	0.334847	0.957558	0.609911
Ichniotherium sphaerodactylum	Thuringian Forest, Germany	Sakmarian-Artinskian	MNG-2356-15	428.8	428.7	308.4	305	118	218.4	219	332.7	90.5	90	5.8	17.4	28	43.5	54.8	63	46.5	20.8	35	46.3	53	32.3	128.3	95.3	128.3	63	3.34217	2.40374	1.70226	-0.00467654	2.59314	0.919719	90.5	90	5.8	17.4	11.6		0.796088	0.797714	0.895965	0.888334	0.273878	0.797046	0.945624	0.673649
Ichniotherium sphaerodactylum	Thuringian Forest, Germany	Sakmarian-Artinskian	MNG-10072	358.5	362.8	275.3	251.7	112.7	211.3	170.4	294.2	81.6	94.6	5.7	30.6	21.4	31.9	39.4	43.9	34.7	29.3	30.2	34	36	22.9	103.3	77.4	103.3	43.9	3.47047	2.66505	2.0455	0.395934	2.84802	1.091	81.6	94.6	5.7	30.6	24.9		-0.12266	-0.103352	0.311941	-0.0650159	0.149738	0.657994	-0.0210013	0.0444348
Ichniotherium sphaerodactylum	Thuringian Forest, Germany	Sakmarian-Artinskian	MSEO-IIIA-519-F1	347.7	346.3	259	242	129.6	194.3	161.5	305.7	81.7	94.7	3.6	10.2	26.3	35.3	42.8	51	42.8	19.3	30.8	37	40.3	28.8	110	85.3	110	51	3.16091	2.35455	1.76636	0.298182	2.77909	1.17818	81.7	94.7	3.6	10.2	6.6		-0.263804	-0.32896	0.0243404	-0.238515	0.54558	0.325055	-0.198017	0.232382
Ichniotherium sphaerodactylum	Thuringian Forest, Germany	Sakmarian-Artinskian	MSEO-IIIA-519-F2	343.8	333.7	276.4	263.5	141.2	217.8	197.8	311	79.3	77.3	5.2	19.8	24.8	37.2	44.4	51.4	39.6	18.7	27.3	33.3	38.3	26	106	87	106	51.4	3.2434	2.60755	2.05472	0.188679	2.93396	1.33208	79.3	77.3	5.2	19.8	14.6		-0.314773	-0.501242	0.33135	0.146045	0.817282	0.785295	0.523969	0.319001
Ichniotherium sphaerodactylum	Thuringian Forest, Germany	Sakmarian-Artinskian	MSEO-nn-2	326.3	329.3	287	269	170.3	235.5	216	343.5	70.3	73	4.8	14.7	?	?	53	?	?	25	41	48.7	55.3	41	122.8	95.7	122.8	?	2.65717	2.33713	1.91775	0.158795	2.79723	1.38681	70.3	73	4.8	14.7	9.9		-0.54348	-0.561405	0.518379	0.24442	1.49888	1.13194	0.885956	0.850156
Ichniotherium sphaerodactylum	Thuringian Forest, Germany	Sakmarian-Artinskian	NHMM-2	389	386.1	259.3	278.1	131.9	175.8	199.3	322.9	95.6	87.3	3.5	29.3	27	39.2	46.8	53	36	24.6	34	41.2	43.6	28.1	105.5	83.6	105.5	53	3.6872	2.45782	1.66635	-0.222749	3.06066	1.25024	95.6	87.3	3.5	29.3	25.8		0.275944	0.215234	0.0296336	0.407187	0.599452	-0.0372623	0.553803	0.513486
Ichniotherium sphaerodactylum	Thuringian Forest, Germany	Sakmarian-Artinskian	NHMM-412	306	314	221.3	218.3	108.8	156	145.8	265.5	85	92	4.3	19.8	28	34	44.3	54.5	45	23.3	32.3	39.4	45.2	30.7	121	78.8	121	54.5	2.52893	1.82893	1.28926	0.0842975	2.19421	0.899174	85	92	4.3	19.8	15.5		-0.80878	-0.770605	-0.640847	-0.662424	0.0583898	-0.425039	-0.510281	-0.424616
Ichniotherium sphaerodactylum	Thuringian Forest, Germany	Sakmarian-Artinskian	NHMS-I-Ba-18	388	372	265	221.3	153	180.3	109	326	94	118.5	-7.8	35.3	30	43	56	63.7	51	21.7	33.3	42.8	51	36	117	94	117	63.7	3.31624	2.26496	1.54103	0.609402	2.78632	1.30769	94	118.5	-7.8	35.3	43.1		0.262875	0.022442	0.130206	-0.608765	1.09367	0.0508688	-1.24221	0.56415
Ichniotherium sphaerodactylum	Thuringian Forest, Germany	Sakmarian-Artinskian	NHMS-1312	438	440	278	264	102	171.5	128.5	337	107	118	-6.3	38	22.5	31.5	47.5	61.5	43	17	26	39	44.3	30	122	94	122	61.5	3.59016	2.27869	1.40574	0.352459	2.7623	0.836066	107	118	-6.3	38	44.3		0.916323	0.952221	0.359581	0.154988	-0.100884	-0.121476	-0.854368	0.743925
Ichniotherium sphaerodactylum	Thuringian Forest, Germany	Sakmarian-Artinskian	NHMW-1963-565	359.5	358.6	257.1	275.2	119.1	186.2	204.5	301.9	87.7	83.4	12.9	24.2	21.6	31.4	38.7	45.8	36.7	23	30.8	37.9	39.2	28.4	105.3	83.6	105.3	45.8	3.41406	2.4416	1.76828	-0.173789	2.86705	1.13105	87.7	83.4	12.9	24.2	11.3		-0.109591	-0.160779	-0.00918368	0.355316	0.299643	0.166419	0.657228	0.170278
Ichniotherium sphaerodactylum	Thuringian Forest, Germany	Sakmarian-Artinskian	PMJ-P-1321-F2 (= JP-2-F2)	406.5	423	310.7	277.3	128	226	188.7	340	87.5	96.5	2.7	24.7	24	32	42	53	44	19.3	32.3	37.5	44	29.7	111	87.3	111	53	3.66216	2.7991	2.03604	0.336036	3.06306	1.15315	87.5	96.5	2.7	24.7	22		0.50465	0.719776	0.936547	0.392878	0.508104	0.945889	0.342975	0.792955
Ichniotherium sphaerodactylum	Thuringian Forest, Germany	Sakmarian-Artinskian	SMMGD-1354	306.3	320	273.8	286	143.7	225	195	360	72.3	83	-9.3	25.7	23.3	36	48	61.7	50.5	21.5	30	34.3	41.3	27.7	104	79.3	104	61.7	2.94519	2.63269	2.16346	0.288462	3.46154	1.38173	72.3	83	-9.3	25.7	35		-0.804859	-0.688565	0.285475	0.54849	0.875839	0.926305	0.468278	1.11982
Ichniotherium cottae	Salop Fm, UK	Moscovian	BU 2471	392.5	389.3	254.2	273	88.3	161.6	187.6	284.3	102.3	92	-12.3	4.2	23.4	33.7	44.5	54	30.8	19.8	26.8	35.3	47.7	25	117.8	79	117.8	54	3.33192	2.15789	1.37182	-0.220713	2.41341	0.749576	102.3	92	-12.3	4.2	16.5		0.321685	0.258989	-0.060352	0.315966	-0.421774	-0.315365	0.321097	-0.117363
Ichniotherium cottae	Pittsburgh Fm, Ohio	Gzhelian	CMNH VP-3052	543	534	361	334.5	168	234.7	202.5	440	97.5	108	-11.8	25.3	39.7	46	63.3	74	39.7	27.3	37	47.3	55.3	28.3	148.7	112	148.7	74	3.65165	2.42771	1.57835	0.216543	2.95898	1.12979	97.5	108	-11.8	25.3	37.1		2.28856	2.2375	1.82405	1.41598	1.44501	1.11628	0.617449	2.42728
Ichniotherium cottae	Pittsburgh Fm, Ohio	Gzhelian	OSU 16553	533	538.3	398.9	386.9	79.4	293.7	280.3	352	87	89.6	-32.6	5.9	38.6	57.4	79.8	86	?	31.6	46	57.1	66.9	?	157.9	99.1	157.9	86	3.37555	2.52628	1.86004	0.0848638	2.22926	0.50285	87	89.6	-32.6	5.9	38.5		2.15787	2.2963	2.49277	2.35324	-0.630235	2.27177	2.16485	0.989074
Ichniotherium cottae	Marietta, Ohio	Gzhelian-Asselian	Marietta_NA	657	642	403.3	410.5	?	235	254	450	108	102	3	9	38.4	60	74	89	42	31	43.33	57.75	73.5	41	164	103	164	89	4.0061	2.45915	1.43293	-0.115854	2.7439	?	108	102	3	9	6		3.77842	3.71421	2.5704	2.77536	?	1.12215	1.64175	2.59071
Ichniotherium cottae	Lodève Basin, France	Asselian	MNHN-LOD 83	552	544.33	448	425.75	167.5	358.67	319.75	439	74	79.33	?	16.4	57	70.33	76.33	83	59.33	50.67	58.67	62	70.67	47.33	161.3	132.33	161.3	83	3.42219	2.77743	2.22362	0.24129	2.72164	1.03844	74	79.33	?	16.4	?		2.40618	2.37875	3.3591	3.04813	1.4333	3.54419	2.94948	2.41094
Ichniotherium cottae	Maroon Fm, Colorado	Asselian-Sakmarian	DMNS 50618	464.5	461	284	297.7	99.8	165	184.3	320	101	94.5	-8.5	11.3	27	37.7	54.3	66	35.7	22.5	29.8	44.3	57	30.3	130.7	97	130.7	66	3.55394	2.17292	1.26243	-0.147666	2.44836	0.763581	101	94.5	-8.5	11.3	19.8		1.26265	1.23936	0.465446	0.757762	-0.152414	-0.248777	0.255462	0.46609
Ichniotherium cottae	Maroon Fm, Colorado	Asselian-Sakmarian	DMNS 50622	410	405.5	297.3	314	89.5	212	241.3	302	88.5	81.5	0.5	9.5	25.7	40.8	55.3	67.7	39	20	34.5	48.3	57	30	113	91	113	67.7	3.62832	2.63097	1.87611	-0.259292	2.67257	0.792035	88.5	81.5	0.5	9.5	9		0.550392	0.480495	0.700114	1.04931	-0.393667	0.671704	1.38916	0.171912
Ichniotherium cottae	Maroon Fm, Colorado	Asselian-Sakmarian	DMNS 55056	225.4	263.3	168.8	197.8	90	125.3	154.3	210.7	91.6	100	-9.4	24.8	19.8	29.6	41.3	51.3	26.6	14	23.3	31	36	16.7	84.6	59.8	84.6	51.3	2.6643	1.99527	1.48109	-0.34279	2.49054	1.06383	91.6	100	-9.4	24.8	34.2		-1.86214	-1.46384	-1.56717	-1.0291	-0.381955	-1.02629	-0.341221	-1.32023
Ichniotherium cottae	Thuringian Forest (GB type), Germany	Asselian-Sakmarian	MNG-2047	357.5	355	213.7	229.3	75.8	124	151.3	256	107	96.5	8.3	22.3	?	?	?	?	?	?	?	?	?	?	77.3	?	77.3	?	4.62484	2.76455	1.60414	-0.353169	3.31177	0.980595	107	96.5	8.3	22.3	14		-0.135729	-0.210003	-0.774943	-0.465673	-0.714556	-1.05175	-0.400889	-0.579877
Ichniotherium cottae	Thuringian Forest (GB type), Germany	Asselian-Sakmarian	MNG-2049	375	409	276	296	219.3	202.5	206	317	86	86	3.7	40.3	24.5	35.5	48	58	28	24.7	29.3	39	44.7	22.3	125	84.3	125	58	3	2.208	1.62	-0.028	2.536	1.7544	86	86	3.7	40.3	36.6		0.0929781	0.528351	0.324292	0.727355	2.64659	0.485649	0.687062	0.417061
Ichniotherium cottae	Thuringian Forest (GB type), Germany	Asselian-Sakmarian	NHMS AP-244-19	217.5	211.5	140.7	139.3	39.8	97.3	94.7	149	101	101	3.8	17.5	13.3	21.7	26.5	34	16	11	18	20	24	?	63	?	63	34	3.45238	2.23333	1.54444	0.0412698	2.36508	0.631746	101	101	3.8	17.5	13.7		-1.96538	-2.17211	-2.06297	-2.07546	-1.55777	-1.57466	-1.52663	-2.3286
Ichniotherium cottae	Thuringian Forest (GB type), Germany	Asselian-Sakmarian	NHMS P-418	240.3	234.6	168.3	167.5	49.3	122.7	117.2	168.2	89.7	90.4	13.6	22.2	14.6	23.4	28.6	35.6	18.2	12	15.5	22	27	?	65	51	65	35.6	3.69692	2.58923	1.88769	0.0846154	2.58769	0.758462	89.7	90.4	13.6	22.2	8.6		-1.66741	-1.85626	-1.57599	-1.57106	-1.33526	-1.07721	-1.07912	-2.01481
Ichniotherium cottae	Thuringian Forest (GB type), Germany	Asselian-Sakmarian	MNG-1386-F1	404	437	305	325	121.5	227.5	238.5	300	85	84	14	31	36	47.3	60.3	72	?	25	35.5	45	52	?	133	92	133	72	3.03759	2.29323	1.71053	-0.0827068	2.25564	0.913534	85	84	14	31	17		0.471978	0.911201	0.835975	1.24606	0.355857	0.975267	1.33347	0.139226
Ichniotherium cottae	Tlumaczow, Poland	Sakmarian	Kletno No. 1	485	467	306	331.75	?	188	234	365	106	90	1	34.5	28.67	41.67	59.33	71.33	42	21.33	38.67	48.67	61	35.67	139.67	99.67	139.67	71.33	3.47247	2.19088	1.34603	-0.329348	2.6133	?	106	90	1	34.5	33.5		1.53056	1.3214	0.853619	1.3668	?	0.201671	1.24397	1.20154
Ichniotherium cottae	Thuringian Forest (Brom type), Germany	Sakmarian-Artinskian	MNG-1352	456	441	254	251.5	51.7	113	122.5	276	129	124	22	30.3	17	33.3	43.3	51	23.7	13.5	30.5	40	46	23	84	76	84	51	5.42857	3.02381	1.34524	-0.113095	3.28571	0.615476	129	124	22	30.3	8.3		1.15156	0.965894	-0.0638808	-0.0685932	-1.27904	-1.26718	-0.973704	-0.253012
Ichniotherium cottae	Thuringian Forest (Brom type), Germany	Sakmarian-Artinskian	MNG-1819	303	300	182.5	182.5	48.7	103	103.5	199	111	111	-2.3	20.3	13	19.5	27	37.5	18	11	20.5	26.5	30.5	15.5	71	55	71	37.5	4.26761	2.57042	1.4507	-0.00704225	2.80282	0.685915	111	111	-2.3	20.3	22.6		-0.847987	-0.96203	-1.32544	-1.30276	-1.34931	-1.46303	-1.3516	-1.51144
Ichniotherium cottae	Thuringian Forest (Brom type), Germany	Sakmarian-Artinskian	MNG-2356-16-F1	366.3	366.3	222.8	222.8	34.4	128.3	125.8	219.7	110	110.7	3	25.5	16	26	35	42.3	?	13	26	32.3	40.7	22.5	72.3	68	72.3	42.3	5.06639	3.0816	1.77455	0.0345781	3.03873	0.475795	110	110.7	3	25.5	22.5		-0.0207218	-0.0554953	-0.614381	-0.581935	-1.68425	-0.967535	-0.908069	-1.17314
Ichniotherium cottae	Thuringian Forest (Brom type), Germany	Sakmarian-Artinskian	MNG-2356-16-F2	407.3	401.5	244.3	238.3	45	134.8	128.3	246.5	113	115.5	7	16.5	16.7	28.3	37	43	?	12	27	30	40.5	?	73	67	73	43	5.57945	3.34658	1.84658	0.0890411	3.37671	0.616438	113	115.5	7	16.5	9.5		0.515106	0.425802	-0.23503	-0.304695	-1.43597	-0.840235	-0.858346	-0.735137
Ichniotherium cottae	Thuringian Forest (Brom type), Germany	Sakmarian-Artinskian	MNG-10179	289	306.7	218.8	195	79.4	169.3	116.8	231.7	82.7	105	-2.6	20	12	26	34.5	40	17	11.3	21.7	29.7	36	22	80	61.5	80	40	3.6125	2.735	2.11625	0.65625	2.89625	0.9925	82.7	105	-2.6	20	22.6		-1.03095	-0.870419	-0.684958	-1.07918	-0.630235	-0.164563	-1.08707	-0.977017
Ichniotherium cottae	Thuringian Forest (Brom type), Germany	Sakmarian-Artinskian	MSEO-I-36	272	260.5	227	219.7	80	181.3	171.7	233.5	90	87	2.8	26.3	17.5	30	35.3	42	?	15	20.5	27	34	17	78.7	60.5	78.7	42	3.45616	2.88437	2.30368	0.121982	2.96696	1.01652	90	87	2.8	26.3	23.5		-1.25312	-1.50212	-0.540275	-0.637383	-0.616181	0.0704535	0.00485497	-0.9476
Ichniotherium cottae	Thuringian Forest (Brom type), Germany	Sakmarian-Artinskian	PMJ P-1321-F3	312	343.5	219.3	202.7	60.5	146	113	225	95	112.5	13	33.5	16	26.7	34.5	42	21	12	26	32.5	40.5	16	66	57	66	42	4.72727	3.32273	2.21212	0.5	3.40909	0.916667	95	112.5	13	33.5	20.5		-0.730366	-0.367245	-0.676136	-0.941454	-1.07292	-0.620886	-1.16265	-1.08652
Ichniotherium cottae	Thuringian Forest (Brom type), Germany	Sakmarian-Artinskian	SSB-1	349.5	356	222.3	197.3	45.5	124.7	83	226.5	110	132	9	26.8	16.7	26.7	37.3	47.7	24	13.7	25.3	35.3	40.3	22.7	78	63	78	47.7	4.48077	2.85	1.59872	0.534615	2.90385	0.583333	110	132	9	26.8	17.8		-0.24028	-0.19633	-0.623203	-1.03804	-1.42426	-1.03804	-1.75934	-1.062
Ichniotherium cottae	Thuringian Forest (Brom type), Germany	Sakmarian-Artinskian	UGKU 130-F1	343.7	350.8	203.3	229.4	73.6	110	148.8	248	115	99	17.2	20.8	15.3	26	36.5	43.4	23.3	13	26	33.5	38.7	20.5	83	61.3	83	43.4	4.14096	2.4494	1.3253	-0.46747	2.98795	0.886747	115	99	17.2	20.8	3.6		-0.31608	-0.26743	-0.958443	-0.463884	-0.766086	-1.32594	-0.450613	-0.710623
Ichniotherium cottae	Thuringian Forest (Brom type), Germany	Sakmarian-Artinskian	UGKU 130-F2	384	392.2	243.2	241	61	152	137.2	252.8	103.3	108.8	16.4	21.4	15	27.5	36	47.5	21.3	13	27.5	36	42	25	81.5	65.5	81.5	47.5	4.71166	2.98405	1.86503	0.181595	3.10184	0.748466	103.3	108.8	16.4	21.4	5		0.210599	0.298641	-0.254439	-0.256401	-1.06121	-0.503378	-0.68133	-0.632175
Ichniotherium cottae	Thuringian Forest (Brom type), Germany	Sakmarian-Artinskian	MB.ICV.3-F1	371.2	358.5	225.2	219.8	46.7	132.7	120.3	231	110	112	13.6	30.3	14	25.8	35.3	42.8	21	15.5	25.3	29.6	34.5	17	73	61	73	42.8	5.08493	3.08493	1.81781	0.169863	3.16438	0.639726	110	112	13.6	30.3	16.7		0.0433161	-0.162146	-0.572035	-0.635595	-1.39615	-0.881363	-1.01746	-0.988458
Ichniotherium cottae	Thuringian Forest (Brom type), Germany	Sakmarian-Artinskian	MB.ICV.3-F2	327	335	203	195.5	64	119	104	233	111	115	9.7	21.5	14.3	25.7	35	42.8	21	15.5	25.3	29.6	34.5	17	73	?	73	42.8	4.47945	2.78082	1.63014	0.205479	3.19178	0.876712	111	115	9.7	21.5	11.8		-0.534332	-0.483467	-0.963737	-1.07024	-0.990943	-1.14967	-1.34166	-0.955771
Ichniotherium cottae	Boskovice Basin, Czech Republic	Asselian	PM PAL113	320.35	326.48	224.5	232.8	132.6	155.33	157.3	299.3	87.43	83.54	-2.1	5	23.41	30.68	38.8	46.24	27.53	18.78	26.16	31.87	36.7	22.4	104.6	76.08	104.6	46.24	3.06262	2.14627	1.48499	-0.0188337	2.86138	1.26769	87.43	83.54	-2.1	5	7.1		-0.62124	-0.599963	-0.584386	-0.40307	0.615848	-0.438161	-0.281553	0.127785
			AVERAGE	367.886	370.359	257.62	255.335	106.307	177.703	171.456	291.481	93.0011	95.4677	4.27119	22.8769	22.9991	34.5902	44.8865	52.7802	36.0955	19.3449	29.651	37.0942	43.0928	26.6133	103.516	81.2293	103.516	52.7802	3.63	2.51758	1.71904	0.0627058	2.84296	1.02216	93.0011	95.4677	4.27119	22.8769	18.6575
			STDV	76.5172	73.1357	56.6757	55.9081	42.6938	51.0603	50.278	61.1874	12.3916	12.6604	10.3532	10.7985	7.98627	8.97043	10.9078	12.5699	10.6515	6.34727	6.65616	7.88295	9.49219	6.32507	24.0698	15.2428	24.0698	12.5699	0.650177	0.301498	0.26008	0.238822	0.273495	0.275426	12.3916	12.6604	10.3532	10.7985	11.8804
			VAR	5854.88	5348.82	3212.14	3125.72	1822.76	2607.15	2527.88	3743.9	153.553	160.285	107.189	116.608	63.7805	80.4686	118.979	158.003	113.455	40.2878	44.3045	62.1408	90.1017	40.0065	579.357	232.344	579.357	158.003	0.42273	0.0909008	0.0676417	0.057036	0.0747996	0.0758592	153.553	160.285	107.189	116.608	141.144
[truncated: 29 more columns]

## Sheet: PCA Summary
PC	Eigenvalue	% variance
1	16.2444	52.685
2	4.33647	14.064
3	2.81319	9.1239
4	2.04855	6.6439
5	1.36387	4.4234
6	1.08893	3.5317
7	0.901964	2.9253
8	0.445816	1.4459
9	0.393034	1.2747
10	0.288689	0.93629
11	0.227395	0.7375
12	0.150776	0.489
13	0.121202	0.39309
14	0.09318	0.30221
15	0.0612704	0.19871
16	0.0546008	0.17708
17	0.0474215	0.1538
18	0.0395356	0.12822
19	0.0293901	0.095319
20	0.0274638	0.089072
21	0.0165647	0.053723
22	0.0113957	0.036959
23	0.00829812	0.026913
24	0.00648908	0.021046
25	0.0049503	0.016055
26	0.00333956	0.010831
27	0.00236581	0.0076729
28	0.0015387	0.0049904
29	0.00069716	0.0022611
30	0.000481575	0.0015619
31	2.2636E-05	7.3414E-05

## Sheet: PCA Scores
	PC 1	PC 2	PC 3	PC 4	PC 5	PC 6	PC 7	PC 8	PC 9	PC 10	PC 11	PC 12	PC 13	PC 14	PC 15	PC 16	PC 17	PC 18	PC 19	PC 20	PC 21	PC 22	PC 23	PC 24	PC 25	PC 26	PC 27	PC 28	PC 29	PC 30	PC 31	PC 32	PC 33	PC 34	PC 35
DBM 060003309001-4	9.77	-4.2123	4.1888	-1.096	-0.8739	-3.2321	1.8831	0.29325	-1.2799	-0.47005	0.4288	0.36821	-0.11106	0.54379	0.52738	-0.21473	-0.28228	-0.10154	-0.063938	-0.10899	0.035847	-0.019018	-0.0090754	-0.0026269	0.072361	0.0007167	0.036246	-0.056223	0.012179	-0.014614	0.0066229	-1.3769E-11	1.5601E-15	-8.525E-16	-5.294E-16
BGR-P-12539-F1	-1.5665	-1.1747	-0.019354	-0.68189	1.5868	-0.37339	0.51699	-0.25453	0.3738	0.019196	-0.011126	-0.056603	0.003859	-0.10859	-0.15213	0.22946	-0.24155	0.044229	-0.072049	0.052266	0.11955	0.033652	0.15138	0.034957	0.016284	-0.031154	-0.020505	-0.007483	0.017858	0.015349	0.0015232	-1.0872E-10	-2.0705E-16	1.4487E-17	-2.5122E-17
BGR-P-12539-F2	-1.9401	-0.8793	0.14431	0.43674	-0.28991	0.9177	0.35057	0.42729	0.075938	0.66628	0.098252	-0.26555	0.095453	0.15182	-0.089299	0.034109	-0.0015099	-0.071931	-0.144	0.031685	0.14841	-0.099758	-0.028905	0.029833	0.11366	-0.05259	-0.091106	-0.015925	-0.12271	-0.04493	-0.002551	-2.1917E-10	-7.3974E-17	-1.5808E-16	1.4428E-16
BUW-1	-1.1233	-2.2731	-0.75824	5.8253	2.0151	-0.81237	-2.1968	0.36555	-0.81155	-0.10904	-0.39247	-0.11816	-0.15095	-0.29303	-0.059949	0.060823	-0.49311	-0.13514	0.076176	-0.22753	0.2547	0.010973	-0.10925	0.059316	0.02373	-0.086983	0.0098515	-0.014858	0.015874	0.011313	-0.0022311	1.5725E-10	1.326E-15	-2.8147E-16	1.196E-16
BUW-2-F1	-1.6563	-1.6071	-1.0677	-1.6464	1.1462	-0.77847	0.34341	0.11471	0.58258	-0.59981	0.53968	-0.2543	0.15509	-0.2081	0.024188	0.3923	0.19168	0.0091782	-0.072955	-0.089133	-0.20116	0.053739	-0.028033	-0.024796	0.020833	-0.14299	0.12228	-0.032106	-0.0053059	-0.035134	-0.0013965	1.41E-10	2.4788E-17	-1.522E-17	-5.7198E-17
BUW-2-F2	-1.5076	-1.6771	1.0072	-1.2076	1.349	0.57399	0.12389	-0.70739	0.07889	-0.25142	1.1344	0.10451	0.23289	-0.28722	-0.37184	-0.15546	0.26575	0.0044008	-0.0069542	-0.12334	0.27447	-0.098859	0.076928	-0.15431	0.14119	0.034368	-0.035901	0.028758	0.016735	-0.00041469	0.0042724	-7.0946E-11	-1.0502E-16	2.1427E-16	1.4676E-16
FG-525	1.8551	-0.33227	-1.3116	-0.5204	0.58609	1.3672	1.1192	0.32102	-1.1656	0.35061	0.25172	0.3461	-0.072432	-0.17548	0.31441	0.19941	0.12742	0.23006	0.014916	-0.44037	-0.041722	-0.022846	-0.048115	0.10204	0.071997	-0.0074353	0.10855	0.074535	-0.0017559	0.015101	-0.011248	-1.1815E-10	9.5279E-17	-1.8495E-17	-7.5848E-17
HF-51	-0.10202	-0.35783	0.029442	-1.4395	-0.15033	0.43075	-1.0144	0.20998	-0.73644	0.063414	0.21382	-0.12474	-0.26833	-0.0002309	-0.2559	-0.044781	-0.30051	-0.079333	-0.09239	-0.014604	-0.15244	0.022375	-0.24821	-0.15619	-0.10582	0.045385	-0.053835	0.021754	0.0046651	-0.0016771	0.0051753	7.0117E-10	1.0721E-15	2.6027E-16	2.3354E-17
HF-55	-1.2025	0.062375	-0.71372	-0.23799	0.48357	1.269	0.99562	-0.011071	-0.35414	0.16444	0.3102	0.19806	-0.27733	-0.14827	-0.12044	0.35961	-0.074668	0.071883	-0.020067	-0.069754	0.021617	0.18664	0.16273	-0.037783	0.002889	-0.0029264	-0.084268	-0.028218	0.03602	-0.04295	-0.00049164	1.6092E-10	-5.9469E-17	9.5374E-17	-2.2832E-17
HF-56	-0.6177	-1.29	-1.9594	0.44533	-0.049286	0.9753	1.2958	0.17303	0.0013925	-0.055228	-0.23765	-0.4196	-0.0013097	0.39941	-0.61309	-0.043363	-0.1913	0.35654	0.12288	-0.36312	-0.068665	0.13861	-0.046765	-0.0068259	0.088382	0.069909	-0.0048713	0.021555	0.0067519	-0.018215	0.013208	-3.6096E-10	-2.881E-16	5.3514E-17	-1.584E-16
HLMD-WT-297	-2.5232	0.6221	0.02003	-0.49465	0.6019	0.3042	-0.091244	0.21191	-0.21961	-0.36127	0.28918	-0.5576	0.22241	0.10265	0.24874	0.14288	-0.31862	-0.049023	-0.0057053	0.013577	0.0056522	-0.063272	0.073483	-0.021732	-0.049869	-0.030047	-0.006548	-0.049624	0.006439	0.031757	-0.0017256	-5.3506E-10	-5.0873E-16	8.676E-17	6.8991E-17
LMJG-8491	-0.6234	-1.822	1.3314	0.47967	0.80724	0.6833	0.36298	-0.87098	-0.40042	-0.44835	-0.40127	-0.38468	-0.3523	-0.1331	0.23611	0.24539	0.062889	-0.10023	0.1615	0.19756	-0.044481	-0.10396	-0.005027	0.083259	0.072221	-0.032235	-0.078581	0.044629	0.0057231	0.010876	0.0034332	1.3588E-10	-1.1331E-16	1.5685E-16	7.8728E-17
MB.ICV.1	0.93771	-2.7681	-0.0053299	-0.62654	-0.20953	0.22402	0.14397	-0.084284	-0.15364	-0.06195	0.25331	0.48626	-0.86575	-0.033576	-0.41593	-0.16757	-0.31928	-0.089496	0.0088826	0.46366	-0.16641	0.00975	-0.018795	0.13744	-0.056106	0.036924	-0.007473	0.037008	0.0097928	0.014615	-0.0087298	-2.7134E-10	4.0336E-16	-9.9066E-17	-5.5387E-17
MB.ICV.2	-1.148	-2.5003	-0.33282	-0.40852	-0.46627	-1.2037	1.227	0.36606	1.3188	0.39026	-0.30579	-0.21746	-0.015202	0.24095	-0.2979	0.28456	-0.19814	0.10906	-0.09019	0.0046295	-0.075795	-0.085028	-0.25525	-0.14716	0.022471	-0.015931	0.025269	0.0072823	0.018254	0.036858	-0.0026327	-3.9089E-11	-1.4505E-17	-2.5351E-16	-2.4298E-16
MB.ICV.4	-1.9482	0.32641	-0.17569	-0.13221	0.97162	-0.78425	-1.2076	0.058367	-0.5368	-0.38373	-0.20556	-0.062048	0.14774	0.040245	-0.30648	-0.32999	0.030972	0.23912	0.025475	-0.056987	0.028144	-0.027786	0.0080748	-0.0070416	0.054517	0.0078309	-0.013781	0.024952	-0.017734	0.018382	0.0037008	-7.5569E-11	3.8244E-16	-9.8361E-17	-3.8711E-17
MNG-1351	-0.10514	-0.4579	-1.4799	-0.26864	1.2557	0.39943	0.47821	-0.092392	-0.1343	-0.030451	0.11142	0.066007	-0.15556	0.001945	0.18792	0.11329	0.16961	-0.020089	0.22247	0.0062295	0.20603	-0.036535	-0.046134	0.089814	0.022873	-0.069235	-0.010032	-0.025718	-0.016394	0.024823	0.0026757	5.0522E-10	2.8781E-16	9.8144E-17	7.9825E-17
MNG-1515-F1	-0.27892	-1.8115	1.0486	0.60632	-0.51267	0.41791	-1.0245	0.63135	-0.016015	0.20898	0.0056942	-0.23471	-0.30624	0.063267	-0.27719	0.083278	0.11278	0.032602	-0.26013	0.15647	0.033198	-0.10042	-0.026864	-0.065643	-0.037832	-0.015474	0.0063974	-0.037799	0.038092	-0.012522	-0.0029097	-5.2954E-12	5.752E-16	-3.0048E-18	3.288E-16
MNG-1515-F2	-1.089	-0.066183	-0.77994	-0.79913	0.30098	-0.47713	-0.13946	0.3697	0.65514	-0.093226	0.091996	-0.26233	0.087459	0.0010371	0.057939	-0.016024	-0.090437	-0.057281	0.032044	-0.096977	0.026844	-0.1666	0.12482	-0.080545	-0.013166	0.067496	-0.041117	-0.065134	0.022971	0.027257	-0.0018158	2.7154E-10	2.496E-16	-1.2525E-17	4.653E-17
MNG-1515-F3	-0.78191	1.3081	-0.14773	-0.45037	-0.019356	0.21129	-0.45275	0.23869	-0.86124	-0.54332	-0.48514	-0.32992	-0.29772	0.012448	0.11178	0.31693	0.03688	0.38495	-0.3355	-0.074937	0.11033	0.052296	0.070096	-0.0079728	-0.078272	0.070556	0.002152	-0.021517	0.017538	-0.014939	-0.0036868	-2.2387E-10	-2.1041E-16	7.6704E-17	-8.053E-17
MNG-1515-F4	-0.95631	0.83705	-0.068307	-0.14694	1.3926	-0.33978	-0.74356	0.5597	-0.073062	-0.29392	-0.15271	-0.0073537	-0.080014	-0.07324	0.097447	0.16855	-0.18267	0.14834	-0.098253	0.08133	-0.049551	0.070566	0.011897	-0.0018978	-0.11703	-0.011427	0.031827	-0.035847	-0.026115	0.0053199	0.00037432	-2.5165E-10	-1.0879E-16	5.6788E-17	-9.7269E-19
MNG-1840-F1	-0.012967	-1.7221	0.3298	-0.11452	-0.38235	0.80751	-0.76829	-0.15353	0.45696	-0.38921	0.10833	-0.089763	0.14061	0.022039	0.012963	0.063988	-0.047853	-0.031991	-0.065991	0.070502	-0.040824	-0.098778	-0.041499	0.047804	0.013815	0.021271	0.010097	-0.016341	-0.014257	-0.0097405	-0.0054634	-2.3442E-10	9.7189E-18	8.9845E-17	8.6847E-17
MNG-1840-F2	2.6879	1.2424	0.32457	-1.5925	1.7389	0.26686	-0.33407	0.97246	-0.67567	0.52014	0.29537	-0.128	0.072323	0.20616	-0.27229	-0.26648	0.17474	0.058694	-0.16466	0.062025	-0.062373	0.010285	0.16234	0.019838	0.00088923	-0.0077841	-0.047886	-0.068389	-0.0060744	0.039834	-0.0018739	2.5123E-10	6.1933E-16	-2.099E-16	1.7786E-16
MNG-2356-15	3.7288	0.60657	-0.69939	-0.83877	-0.097216	0.58007	-0.11202	0.24936	-0.80866	0.18001	0.28557	-0.095907	-0.33911	0.1136	0.0039558	0.11245	0.00095225	0.17005	0.11742	-0.078124	-0.061966	0.039403	0.0010026	0.042091	-0.063539	-0.025182	0.044981	-0.026308	-0.019364	0.00079078	0.0036162	1.165E-10	2.1512E-16	3.8578E-17	-8.627E-17
MNG-10072	-0.16157	-1.3135	1.7532	1.0728	-0.33936	0.82107	-1.0289	-0.84877	0.24697	-0.91823	-0.68281	-0.67039	0.12091	-0.046989	0.29882	0.24538	0.086369	0.057458	-0.20515	0.00044558	-0.048783	-0.1481	-0.0059806	-0.011345	0.036923	0.062244	0.0024495	-0.00099762	-0.0069172	-0.028414	-0.002569	1.1926E-10	-1.6804E-16	2.6972E-16	2.3731E-16
MSEO-IIIA-519-F1	0.61114	-1.5074	0.1052	-0.77036	-0.4088	1.168	1.3393	-0.26636	-0.13693	-0.39079	0.24242	-0.348	-0.27388	0.090176	-0.12035	-0.18044	-0.04219	0.11128	-0.039563	0.14026	0.030552	-0.046714	0.039051	0.10957	0.0090198	0.038216	-0.0047665	0.039843	0.0021574	0.014626	-0.0031786	3.5855E-10	-6.9276E-17	2.0441E-16	1.191E-16
MSEO-IIIA-519-F2	0.81757	-2.4196	1.5645	-0.75336	0.16672	-0.02637	-0.025966	-0.3223	-0.44838	-0.16885	0.15779	0.42789	0.14233	-0.14858	-0.32727	0.23954	-0.11931	-0.069032	0.2914	0.0037786	-0.10663	-0.0052083	-0.0017685	-0.047484	0.027209	-0.028845	-0.029604	0.020781	-0.0047761	-0.015828	-0.010334	-1.7201E-10	5.0788E-16	-8.3123E-17	-4.5733E-17
MSEO-nn-2	3.7528	-2.6862	0.15356	-1.4366	0.4072	1.8232	0.32775	0.075598	0.51303	1.7385	-1.67	0.22444	-0.26022	0.049738	0.33258	-0.20973	-0.014753	-0.14734	0.18516	-0.22354	0.1359	-0.1541	0.065929	-0.10925	-0.089936	0.037367	0.038158	-0.0024387	0.014425	-0.031234	-0.0018211	-9.9681E-11	4.4983E-16	-9.3223E-17	-1.4579E-16
NHMM-2	1.419	-0.11696	-0.097425	0.056095	1.4552	-1.0148	-0.4948	0.17668	1.1318	0.0071853	-0.46165	0.098232	0.27299	-0.013074	-0.12813	-0.15101	-0.030452	0.1798	-0.00059976	-0.053479	-0.32399	0.063793	0.083608	0.095477	-0.0028644	0.05829	0.043412	-0.079271	-0.047842	0.0032638	-0.00032333	1.0322E-10	3.167E-16	1.5826E-16	-5.4454E-17
NHMM-412	0.42359	-1.6771	-3.7568	-0.10479	-0.64155	1.7785	0.053692	0.47625	0.21024	-0.36038	0.42359	-0.9733	-0.32026	0.21037	0.21261	-0.26881	0.044515	-0.50345	0.086582	0.1401	0.0088462	-0.0024757	-0.021313	0.047386	-0.050568	0.032906	0.09985	0.01493	0.0038487	-0.0060825	0.0093528	4.7826E-11	3.2648E-16	2.3564E-16	-1.4321E-16
NHMS-I-Ba-18	2.2424	-0.29125	-0.58811	4	0.028686	1.6855	2.0096	1.1028	0.97464	0.25497	0.78873	0.27517	0.34855	0.48893	0.13911	0.18994	-0.17699	0.029846	0.1604	0.10452	-0.075869	-0.069179	0.081073	0.057046	-0.081609	-0.0073237	-0.048709	0.010873	-0.010764	0.0053531	0.0018326	-1.7389E-11	-8.326E-16	-1.1519E-16	1.9365E-16
NHMS-1312	0.71706	1.5066	-1.2316	3.8546	-0.1632	0.013382	1.0991	0.66806	-1.0653	-0.37104	-0.069931	0.13936	0.14219	-0.31996	0.096923	-0.12712	0.34134	-0.038091	-0.15934	0.047417	-0.31592	-0.010568	0.13891	-0.16959	-0.010841	-0.0084013	0.021097	0.068812	0.026634	0.00094719	-0.001827	1.2293E-10	6.2788E-16	1.2479E-16	8.2187E-17
NHMW-1963-565	0.25442	-0.94824	-0.062374	-1.2725	1.2209	-0.01551	-0.79085	-0.13806	-0.19465	-0.26257	-0.79896	-0.20007	-0.03209	-0.018984	0.13027	-0.15163	0.22505	0.17543	-0.19953	-0.012297	-0.14636	-0.0041358	-0.029076	0.049304	0.1045	0.10648	0.0074215	0.054908	-0.029636	0.018683	0.0028208	1.4927E-11	-1.1222E-17	2.0757E-16	1.567E-16
PMJ-P-1321-F2 (= JP-2-F2)	1.5193	-0.22775	2.3161	0.71395	0.17251	0.31999	0.44305	0.043804	-0.78043	-0.045968	-0.51554	-0.1919	0.054674	0.15491	-0.19449	-0.2622	0.34604	0.17843	0.0043761	0.34188	0.073548	-0.10608	-0.022683	-0.16644	-0.077642	-0.17669	0.04352	0.004135	-0.026785	0.0071429	0.0054126	-2.7639E-10	-6.1537E-17	-2.4084E-16	3.2515E-17
SMMGD-1354	1.6898	-3.081	2.8454	1.1	0.034641	-0.99358	0.5514	1.2398	0.47105	0.46971	0.033811	-0.37483	0.25328	-1.0887	0.30498	-0.26169	0.030001	-0.27145	-0.13506	0.0058167	0.0014732	0.33173	-0.0096253	-0.026283	-0.045003	0.06469	-0.065188	0.047342	-0.029655	-0.0059764	0.00096878	-1.199E-10	3.9756E-16	-3.8889E-16	6.1294E-16
BU 2471	0.361	0.53808	-2.8914	-0.98721	-1.8591	-1.3363	0.46067	-0.28069	-0.31666	-0.48708	-0.531	-0.33087	0.29917	0.038951	0.043838	0.043502	0.22259	-0.03657	0.30606	0.021607	0.20376	0.20894	-0.016126	0.030299	-0.058166	-0.0067745	-0.0013893	-0.0208	-0.035088	0.010731	-0.0042716	1.3922E-10	-1.0772E-17	-1.3337E-16	-1.2044E-16
CMNH VP-3052	6.4777	1.8258	0.10011	2.7189	0.1329	-0.92327	1.3083	-0.96996	0.29219	-0.7035	0.012262	0.45198	-0.06336	-0.31444	-0.47644	-0.42283	0.41086	-0.00070419	-0.020191	-0.29596	0.031649	-0.26274	-0.070355	0.11984	-0.15903	0.048043	-0.019575	-0.046679	-0.0029634	-0.017031	-0.0016142	3.6971E-11	1.5007E-16	5.8828E-17	1.1257E-16
OSU 16553	9.0716	2.4506	-0.77971	0.79493	-4.7514	-1.2368	-1.4791	-0.29268	0.48453	0.32472	-0.02667	-0.21287	-0.39026	-0.14933	-0.20088	0.20052	-0.39507	0.10392	0.022303	-0.13278	-0.033196	-0.10316	0.23505	-0.080404	0.051772	-0.038835	0.015586	0.053951	-0.03455	0.012934	0.00050672	1.1222E-10	8.2139E-18	-1.1917E-16	-4.8006E-16
Marietta_NA	9.5963	5.1949	-1.0085	-0.83259	0.58889	0.015409	1.0054	-1.07	-0.23812	0.44491	0.30954	-0.4303	1.0211	-0.51125	0.10366	0.22571	-0.37346	0.20998	-0.095721	0.3957	0.092788	-0.075053	-0.15082	0.025727	-0.0095983	0.035933	0.011648	0.0036989	0.019451	-0.037368	0.0013535	-4.2617E-10	8.7293E-18	-1.5344E-16	-3.2982E-16
MNHN-LOD 83	13.799	1.3776	2.3137	-0.74848	-0.038265	2.6694	-1.6481	0.36702	1.6858	-1.3189	-0.28991	0.30925	0.19893	0.14882	0.14905	-0.22036	0.092585	0.13495	0.13052	-0.071008	0.059882	0.23093	-0.06637	0.0028934	0.039946	-0.098993	-0.0399	0.01285	0.041167	0.016454	-0.0011659	-5.7103E-11	1.8714E-16	-1.4831E-16	-1.0382E-16
DMNS 50618	2.8855	1.8344	-2.9815	-0.14742	-1.0249	-0.64419	0.69972	-0.091399	-0.36946	-0.099716	-0.42143	0.047491	0.12961	-0.085381	-0.16174	0.45372	0.39668	-0.55224	-0.17054	-0.12205	0.051239	0.046319	-0.084069	-0.017581	-0.017048	0.0036647	-0.054676	-0.011342	0.0058971	0.049164	0.0041977	-8.0826E-11	-7.1039E-18	2.6992E-16	-1.3385E-16
DMNS 50622	3.2138	1.0034	-0.18365	-2.2555	-1.049	-0.49721	-0.84053	0.56116	-0.334	0.94939	0.0034021	0.26059	-0.36786	-0.042632	0.12517	0.26367	0.33522	-0.11399	-0.11074	-0.070165	-0.072479	-0.067998	-0.11847	0.1291	0.045684	-0.038415	-0.10882	-0.015453	0.01751	0.0068267	-0.00073373	2.3533E-10	-3.4032E-16	-2.725E-16	3.0143E-16
DMNS 55056	-3.3997	-2.2538	-3.1741	0.62769	-1.2711	-1.8049	-0.72447	0.33027	1.0405	0.59083	0.89124	-0.016435	-0.071892	0.019221	0.38752	-0.38303	0.18017	0.56311	-0.27462	0.035387	0.22131	-0.0094793	-0.075243	0.088485	-0.031355	-0.0021148	-0.020703	0.036877	0.037158	-0.0075651	-0.001315	1.1442E-10	3.6033E-16	3.1966E-16	-5.8402E-17
MNG-2047	-1.7062	1.8875	0.35542	-1.1684	1.2847	-1.0634	0.11051	1.2144	1.4821	-0.065692	0.10191	0.5408	0.026901	-0.11901	-0.02907	0.26035	0.034531	-0.26462	-0.19694	-0.056211	-0.022518	-0.15048	0.061824	0.031632	0.027793	-0.047264	0.036715	0.071253	-0.0064045	-0.0011466	0.0061647	-4.2283E-11	1.6192E-16	-1.9372E-16	9.3374E-17
MNG-2049	2.2035	-2.5343	-1.0948	1.9322	1.7066	-1.1674	-0.81866	-2.1114	0.25875	0.6003	-0.11088	0.50065	0.42812	1.1884	0.1854	0.3012	0.20607	-0.12321	-0.16447	0.11101	-0.04492	0.16854	0.044301	-0.05799	-0.052282	0.048737	-0.027233	0.046531	-0.0040272	0.0014835	-0.0010445	7.5263E-11	2.9012E-16	7.0074E-17	-3.6601E-17
NHMS AP-244-19	-6.9538	-1.1394	-2.5714	-0.72133	-1.8198	1.0776	-0.087383	0.50272	-0.2358	-0.97047	-0.56282	1.6806	0.20109	-0.17498	0.13256	-0.099207	-0.15461	0.14647	-0.083483	0.20524	0.097333	0.0075818	-0.041822	-0.036102	-0.024608	0.016308	-0.0044697	-0.037558	-0.02333	-0.012001	0.0063346	-2.0338E-10	7.6429E-16	5.0785E-16	-1.9927E-16
NHMS P-418	-6.4516	-1.3854	-0.28495	-1.434	-1.2057	0.99388	-1.0921	0.0074188	-0.51953	0.033079	0.1151	0.40066	1.3581	-0.052665	0.034915	-0.21466	-0.23252	-0.29973	-0.033625	-0.19514	-0.11604	-0.128	-0.016591	0.013431	-0.019812	-0.01991	0.0093409	0.0070154	0.022619	0.0052295	-0.0023253	-1.1491E-10	-3.3174E-16	1.4192E-16	2.3413E-16
MNG-1386-F1	4.2568	0.052971	-1.5695	-0.37376	-0.062324	0.65792	-2.3494	-0.91943	-0.40459	0.070604	1.3523	0.35432	-0.23419	0.053831	-0.038759	-0.15767	-0.0014738	-0.28795	-0.078019	-0.057831	0.054748	0.095026	0.049073	-0.073904	-0.018443	0.020261	0.056095	0.00092599	-0.034696	-0.017684	-0.00077526	-3.2104E-11	-4.9703E-16	-1.0697E-16	3.1679E-16
Kletno No. 1	4.7804	1.9435	-2.551	0.94254	1.2239	-0.88997	-0.74837	0.83841	-0.34982	0.9169	-0.44621	0.34723	0.12879	-0.1881	-0.10444	-0.11928	0.054974	-0.052352	0.32893	0.43093	0.0029714	-0.00043277	0.0015865	-0.020757	0.21724	0.081883	0.060617	-0.038471	0.029799	-0.0095222	6.4706E-06	1.1032E-10	-1.469E-16	-3.3514E-16	4.8799E-16
MNG-1352	-2.7562	5.8642	0.55224	0.032681	1.6634	-0.38998	0.35854	-0.40315	0.18243	0.18534	0.1941	0.29729	-0.51316	0.064415	0.19092	-0.1231	-0.31852	0.054767	0.16232	-0.22452	-0.14314	0.041876	-0.18034	-0.075717	-0.031813	-0.012774	-0.049908	0.02123	-0.025235	-0.010486	0.0010338	1.8759E-10	-8.1415E-16	-3.3975E-16	-2.3816E-16
MNG-1819	-6.4016	1.0551	-1.0038	0.43593	-1.3669	-1.2496	0.19762	-0.33832	0.20037	-0.33812	-0.34589	-0.18711	-0.025628	0.29589	0.052762	-0.38105	0.0702	-0.026862	0.14644	0.096488	-0.16276	0.027126	-0.0099758	0.019801	0.1423	-0.10542	-0.031223	0.013228	0.020066	-0.025535	-0.0043466	3.8286E-10	-1.6397E-16	2.9548E-16	9.4746E-17
MNG-2356-16-F1	-4.0275	3.017	1.3377	0.27437	-0.8793	-0.53351	-0.38411	1.3415	-0.15805	-0.28503	-0.22167	-0.14761	-0.099321	0.55032	-0.23027	0.15449	0.25553	-0.19681	0.028796	-0.015273	0.03675	0.079273	0.0075612	0.058405	-0.0016684	0.011217	-0.020877	-0.010496	0.037753	-0.069431	-0.0020075	-9.5295E-11	1.8199E-16	-2.4618E-16	1.0829E-16
MNG-2356-16-F2	-3.5906	3.9966	2.8917	-0.70049	-0.22475	-0.45751	0.85513	0.99992	-0.2108	-0.33516	-0.21421	-0.060703	0.39216	0.5788	-0.22665	-0.061455	-0.17975	-0.097735	0.0067888	0.029467	0.34734	0.06306	0.010009	0.002487	-0.029601	0.081054	0.063938	0.079692	-0.016759	0.021444	-0.0092061	-5.4132E-11	-6.9364E-16	4.205E-19	3.0368E-16
MNG-10179	-4.1522	-1.2745	1.9117	1.0268	-2.33	0.86386	0.49862	-0.9768	-0.27631	1.0193	-0.33348	0.14425	0.3831	-0.26114	-0.16328	0.084573	-0.088254	0.24886	-0.10833	-0.041882	-0.02294	0.15391	0.065423	0.090055	0.01289	-0.061867	0.025852	-0.041195	0.018876	0.025414	0.006525	2.3297E-11	-6.7679E-16	-1.6483E-16	1.9365E-16
MSEO-I-36	-3.3956	-1.9587	2.2451	-0.22764	-1.0627	-0.84083	-1.3461	0.42557	-0.24371	-0.0058057	0.60485	-0.10224	0.31867	-0.15505	0.1812	0.40076	0.38958	0.31951	0.7191	0.05202	-0.098874	-0.083301	-0.011683	-0.012296	-0.10944	0.091902	-0.028266	0.018227	-0.005388	0.0072662	0.0035133	-2.0441E-11	-4.0367E-16	1.5957E-16	-2.6838E-16
PMJ P-1321-F3	-4.8107	1.375	4.0961	1.0154	-0.46771	0.38069	-0.48984	-0.63543	0.65683	1.0692	0.50479	-0.026389	-0.21555	-0.081965	-0.31878	0.051456	0.32335	-0.089325	0.06574	0.009061	0.070053	0.11123	-0.079421	0.032243	-0.0084486	0.019285	0.12378	-0.031971	0.0077542	0.0040164	0.00065013	-1.1323E-10	-1.0313E-15	1.4118E-16	1.3288E-17
SSB-1	-4.434	2.9513	0.64764	1.6321	-1.2341	1.434	0.79074	-0.41057	0.10825	0.17878	0.5405	-0.24142	-0.16969	0.15713	0.5128	-0.3076	0.041456	-0.015362	-0.037411	-0.050354	-0.10809	0.039301	-0.092272	-0.13799	0.11968	0.04886	-0.02321	-0.094774	-0.0049289	0.031217	-0.0076356	-2.4305E-10	-9.3309E-16	1.5643E-16	2.033E-16
UGKU 130-F1	-3.8997	1.7799	-1.5879	-1.7851	1.4168	-1.3449	-0.12981	-0.48358	0.16329	0.30065	-0.033299	-0.29187	-0.20603	-0.038302	0.29193	-0.37199	-0.086858	0.11204	0.21462	-0.054741	0.020962	-0.028129	0.12059	-0.07552	-0.10054	-0.084099	-0.042453	0.036173	0.01617	-0.009885	-0.0011988	7.1384E-11	-7.072E-16	-1.857E-17	1.3339E-16
UGKU 130-F2	-3.137	2.6026	1.7853	-0.7852	-0.084036	0.52546	0.028811	-0.73403	-0.42364	0.71088	-0.21618	0.016916	0.089522	0.019473	0.08656	-0.24814	-0.0024924	-0.048548	-0.17316	0.074886	-0.08908	0.033679	0.023392	0.13223	-0.057895	-0.086637	0.0046073	0.043799	0.0053081	0.0043597	0.0051181	2.9736E-16	-5.756E-16	-1.8858E-16	-2.635E-16
MB.ICV.3-F1	-4.8043	2.7997	2.0059	0.40691	-0.17206	-0.36824	-0.70622	-0.57741	0.10545	-0.28741	-0.062784	-0.040144	-0.09347	0.014155	0.14639	-0.020692	-0.24724	-0.29636	0.050875	-0.087411	-0.049932	-0.084838	0.071104	0.14902	0.029217	0.058516	0.0062516	-0.0034001	0.025947	-0.0038567	0.0080855
MB.ICV.3-F2	-4.7174	1.7513	0.84868	0.23272	-0.0084583	-0.094389	0.86117	-0.73063	0.66107	-0.56051	-0.12974	0.64682	-0.83001	-0.37927	0.29712	0.28831	0.036204	0.029564	-0.012906	0.16307	0.14957	0.020397	0.032627	-0.094028	0.04188	0.045907	0.048501	-0.0069299	-0.011143	0.012509	0.0029547
PAL 113	-1.0894	-2.0459	-1.316	-1.4566	-0.22357	-0.76273	1.4294	-1.1588	0.52032	-0.36238	-0.3574	-0.27794	-0.0078322	-0.37217	-0.30698	-0.22805	-0.091135	-0.24671	0.10001	-0.040487	-0.0085516	0.11203	0.042055	-0.0036212	-0.034347	-0.010474	0.00037571	-0.024285	0.0091628	-0.0071556	-0.0069843

## Sheet: PCA Loadings
	PC 1	PC 2	PC 3	PC 4	PC 5	PC 6	PC 7	PC 8	PC 9	PC 10	PC 11	PC 12	PC 13	PC 14	PC 15	PC 16	PC 17	PC 18	PC 19	PC 20	PC 21	PC 22	PC 23	PC 24	PC 25	PC 26	PC 27	PC 28	PC 29	PC 30	PC 31
zSp	0.19064	0.28892	0.010391	0.06792	0.067581	-0.063043	0.053007	-0.14628	-0.18569	-0.097997	-0.11518	-0.099055	0.16362	-0.017672	-0.2387	0.15237	-0.086811	0.028638	0.034913	0.089967	-0.10602	-0.30708	-0.031714	0.32628	0.057783	0.015156	-0.37289	-0.022151	-0.14854	0.43454	-0.28915
zSm	0.19294	0.27987	0.014485	0.070468	0.058387	-0.077518	0.014194	-0.21397	-0.15395	-0.022805	-0.023639	-0.14836	0.10837	0.030754	-0.29116	0.088105	0.11965	0.090258	-0.45294	0.13988	0.11321	0.10397	0.21086	-0.27844	-0.32794	-0.22929	0.28672	-0.16807	0.03626	-0.081152	-0.024019
zPp	0.23644	0.072886	0.13639	0.038574	-0.041963	-0.035821	-0.019986	-0.10796	-0.19134	-0.062748	-0.065062	-0.060879	-0.0095413	0.050126	0.03018	-0.067445	-0.11069	0.058659	0.12355	-0.057882	-0.041718	-0.17732	-0.25964	-0.30247	0.032172	-0.26537	-0.22163	0.12149	-0.08294	0.02609	0.6912
zPm	0.23511	0.088315	0.063917	-0.052709	0.022571	-0.16814	-0.10864	-0.091579	-0.18766	-0.00050802	-0.021051	-0.040075	0.058245	-0.032155	0.098757	-0.11324	0.039113	-0.0074978	-0.13269	0.062143	-0.038325	0.56462	0.14634	-0.108	0.12896	0.47536	-0.38813	0.20137	0.020068	-0.077679	0.014137
zDpm	0.16444	-0.27956	0.043823	0.086794	0.24137	-0.088169	0.2158	-0.20972	0.00037766	0.00022322	-0.012401	0.15097	-0.042073	0.50325	0.1506	-0.11908	0.059704	-0.16668	0.041752	-0.31505	-0.014674	0.14629	0.062247	0.15652	-0.39995	-0.023333	-0.05224	-0.13405	-0.1321	0.18106	0.012447
zGp	0.22432	-0.11055	0.18854	0.0082756	-0.10742	0.022686	-0.098371	-0.068675	-0.15984	-0.063446	-0.038579	0.031573	-0.068474	0.043217	0.18232	-0.14414	-0.048827	0.14658	0.10672	-0.12128	0.035031	-0.021772	0.22326	-0.031963	0.13415	-0.52228	-0.071233	0.34389	0.038607	-0.23365	-0.4583
zGm	0.22387	-0.063602	0.055894	-0.17213	0.0018378	-0.21221	-0.23592	-0.00085098	-0.14937	0.02452	-0.050108	0.05499	-0.013512	0.049703	0.1606	-0.11007	0.029752	0.19211	0.040794	-0.0099143	0.13678	0.092123	-0.01531	0.057502	0.47534	-0.035126	0.32267	-0.51596	-0.11725	0.24806	0.017074
zGAD	0.23102	-0.0097837	0.071321	0.089076	0.16874	-0.10669	0.20584	-0.066167	-0.14536	-0.033885	-0.1226	-0.12637	0.020563	-0.29122	0.020611	-0.21111	-0.010768	0.018616	0.13726	-0.10227	-0.040829	-0.15929	-0.24569	0.19929	-0.10757	0.155	-0.008449	-0.33016	0.33555	-0.49449	-0.068836
zPap	-0.10761	0.39732	-0.13393	0.052875	0.12355	-0.16594	0.088555	0.0040845	0.008404	-0.1379	-0.0093035	0.16426	0.069109	0.031115	0.30398	0.041195	0.078856	0.14082	0.5688	0.23829	-0.1778	0.0063895	0.30516	-0.2078	-0.15617	0.010381	0.06543	-0.096669	-0.01156	-0.023856	-0.0043649
zPam	-0.12062	0.31608	0.0028523	0.32601	-0.061765	0.14876	0.26282	-0.06159	0.054067	-0.047432	0.21281	-0.023479	-0.051915	0.13869	0.3183	-0.2122	0.12185	0.46819	-0.24529	-0.073792	0.27707	-0.046407	-0.16812	0.14102	0.098426	0.11041	0.0038149	0.098886	-0.027313	0.043129	0.011925
zOap	-0.1099	0.10459	0.046113	-0.18547	0.53002	0.40075	-0.27187	-0.18506	-0.16416	0.0022168	0.2142	-0.0019171	-0.08454	-0.075542	0.08437	-0.029025	-0.0039707	-0.03441	0.036074	-0.041021	0.03688	0.048697	-0.0294	-0.0022496	-0.011634	-0.073474	-0.0013206	0.042355	0.46477	0.25397	0.022281
zOam	-0.066776	0.0013305	0.0074346	0.49894	0.40362	0.087554	-0.46266	0.07444	-0.078739	0.10479	0.070906	0.057892	0.015868	-0.044928	-0.0456	-0.012441	0.0016389	-0.053496	-0.010122	-0.026748	-0.028881	-0.067616	-0.0055563	0.0047049	0.035452	0.042602	-0.012363	-0.045099	-0.48722	-0.27226	-0.019838
zpI	0.2225	0.011491	-0.027725	-0.038639	-0.029212	0.091865	-0.029817	-0.018801	0.30481	-0.29318	0.38306	0.10496	0.16965	0.040901	-0.41965	-0.44544	0.346	-0.090474	0.16	-0.02305	0.0028986	-0.08655	0.074291	-0.081384	0.14047	0.033818	-0.035477	-0.0066602	-0.0069109	-0.006733	0.0052754
zpII	0.23113	0.056625	-0.00069724	-0.045751	-0.031078	0.052813	-0.053289	0.019927	0.20769	-0.082834	0.35764	0.1005	0.14166	-0.076563	-0.11196	0.25987	-0.41801	0.33465	0.10955	-0.11587	-0.20229	0.38362	-0.23168	0.18265	-0.15321	-0.10246	0.099728	-0.011975	-0.069333	-0.064424	0.00079168
zpIII	0.23706	0.073158	-0.039947	0.045784	-0.069008	-0.04475	-0.01529	0.040407	0.08938	0.18194	0.23926	0.12456	-0.032924	-0.10585	0.065556	0.15466	-0.35111	-0.064928	-0.016642	-0.37994	0.31321	-0.33513	0.36648	-0.25487	-0.014956	0.25371	-0.07798	-0.087082	0.099222	0.041556	-0.011666
zpIV	0.22787	0.081406	-0.026123	0.038419	-0.092029	-0.12967	0.036681	0.01887	-0.030252	0.14911	0.39054	0.20909	0.011695	-0.16725	0.38081	-0.11563	-0.028304	-0.44864	-0.24302	0.38877	-0.14322	-0.084827	-0.12379	0.12982	-0.059204	-0.15614	0.048973	0.023163	-0.017942	0.05529	-0.0074594
zpV	0.17352	-0.11008	0.080153	0.017631	0.15994	0.018669	0.14652	0.62736	-0.21357	-0.26769	0.28346	-0.4125	-0.15742	0.20965	0.040788	0.21323	0.069313	-0.018419	0.015299	0.1092	0.028078	-0.014675	0.075035	-0.014631	0.0082078	0.016697	-0.022038	-0.029568	0.023568	0.00037546	0.0026921
zmI	0.21095	-0.015725	0.0078086	0.020711	0.02674	0.13881	-0.21341	-0.13611	0.46881	-0.44366	-0.25755	-0.23407	0.18761	-0.067502	0.41178	0.24799	0.10906	-0.14568	-0.13294	-0.053333	0.021905	-0.06584	-0.032895	-0.024281	0.0068963	0.035098	0.019731	-0.014939	-0.0091092	-0.0072102	-0.0016055
zmII	0.22296	0.09376	0.035029	-0.017869	0.031245	0.15182	-0.1315	0.07204	0.33581	0.10134	-0.24241	-0.11544	-0.44544	0.13728	-0.086601	-0.32681	-0.34095	0.060425	0.070059	0.41199	0.16387	0.011957	0.058214	0.080547	-0.17169	0.050603	-0.032826	-0.030911	-0.016291	0.031378	0.0016198
zmIII	0.22252	0.14433	-0.058876	-0.03721	0.0014388	0.12383	0.0035878	0.016384	0.16025	0.3741	-0.026185	-0.11269	-0.26618	0.11765	0.027277	0.063141	0.25442	0.14061	-0.13069	-0.20458	-0.66573	-0.12935	0.091425	-0.038304	0.13765	0.053695	0.052785	-0.0039622	0.048537	-0.022631	0.0079834
zmIV	0.2113	0.19194	-0.076782	-0.0095682	-0.038824	0.090306	0.01777	0.038695	0.1133	0.45717	-0.012893	-0.093773	0.035907	-0.002634	-0.024102	0.28038	0.39679	-0.1453	0.30948	-0.025378	0.42743	0.2049	-0.15437	0.11616	0.007024	-0.17786	-0.12642	-0.00030253	-0.014464	-0.069821	0.005979
zmV	0.17343	0.039812	-0.076296	-0.096745	0.11174	0.41389	0.16519	0.41767	-0.084559	0.16085	-0.31193	0.20598	0.55246	0.044243	0.074328	-0.20964	-0.11222	0.028032	-0.096574	-0.004799	-0.028411	0.010107	0.015639	-0.081899	-0.011678	0.0028274	0.062862	0.026243	-0.037641	0.037603	-0.0054672
zpL	0.23843	-0.01425	-0.12165	0.089178	0.00078719	-0.0011031	0.035823	-0.14279	-0.20117	-0.013217	-0.054102	-0.14784	-0.023984	-0.055927	-0.052915	-0.016685	-0.019344	-0.10443	0.22317	-0.043036	0.043412	-0.052268	-0.042613	0.10199	-0.0053662	0.28677	0.61982	0.50867	-0.07606	0.12028	0.033222
zmL	0.21742	0.0030465	-0.048222	0.034143	0.084826	0.12036	0.12556	0.096547	-0.083362	-0.29086	-0.19466	0.64736	-0.41793	-0.14495	-0.10923	0.26922	0.1905	0.044242	-0.11	0.032083	0.070708	0.016581	-0.098269	-0.033026	0.047422	0.047422	-0.0098039	0.039073	-0.00047696	-0.018342	0.000888
zSp/pL	-0.10226	0.38989	0.22554	-0.034598	0.063874	-0.088308	0.01864	0.037038	0.058244	-0.094922	-0.077206	0.13022	0.053993	0.34038	-0.10667	0.089649	-0.16861	-0.28574	-0.076383	-0.088023	0.011245	0.021644	0.21241	0.39364	0.30188	-0.061007	0.1232	0.071898	0.15032	-0.28213	0.23798
zPp/pL	-0.0537	0.21426	0.5076	-0.069227	-0.075721	-0.05422	-0.10547	0.059807	0.02119	0.036347	0.0044241	0.093791	0.012926	0.28487	-0.013687	0.040903	-0.0078714	-0.13275	0.067911	-0.028587	-0.022695	-0.069598	-0.47087	-0.37521	-0.076187	0.21048	0.10694	0.00083755	0.016644	0.012699	-0.34448
zGp/pL	0.038487	-0.16352	0.5099	-0.078277	-0.19545	0.075541	-0.24484	0.03712	-0.066133	0.089402	0.044455	0.13698	0.1391	-0.071808	0.042515	0.092229	0.26267	0.27054	0.030033	0.15535	0.012571	-0.19054	0.24171	0.30822	-0.31572	0.17229	0.019231	0.037751	0.034014	0.0050194	0.20748
z(Gp-Gm)/pL	-0.011993	-0.0813	0.29731	0.36456	-0.26152	0.50205	0.26539	-0.22388	-0.10234	-0.016564	0.031474	-0.072676	-0.046663	-0.088406	-0.026276	0.082679	-0.10293	-0.20669	0.15876	0.10041	-0.10807	0.20909	0.16921	-0.089795	0.18926	0.024526	0.042215	-0.26856	-0.027696	0.067676	0.0061592
zGAD/pL	-0.066303	0.077562	0.45149	-0.011443	0.32909	-0.22539	0.29135	0.1512	0.271	0.065316	-0.069143	-0.070545	-0.067446	-0.4754	-0.019529	-0.12014	0.035047	-0.020251	-0.029986	-0.16681	0.0016846	0.13345	0.1048	-0.032303	0.025052	-0.13631	0.069474	0.11699	-0.18079	0.23284	0.033313
zDpm/pL	0.082233	-0.34815	0.081772	0.047047	0.36257	-0.11596	0.25245	-0.23881	0.21088	0.19205	0.0707	0.065651	0.18963	0.18398	-0.04964	0.23625	-0.059905	0.19098	-0.013646	0.40707	0.045116	-0.14425	-0.0093606	-0.13788	0.29909	0.058816	-0.0029784	0.12471	0.10278	-0.10833	-0.0066347
zOam-Oap	0.04342	-0.086068	-0.026138	0.61077	-0.094272	-0.25119	-0.20218	0.23194	0.10986	0.040559	-0.13594	0.081405	0.099404	0.031917	-0.085798	-0.025933	0.022982	0.021229	0.02321	-0.017701	-0.067655	0.12311	-0.036209	-0.011423	0.0076723	-0.094262	0.017581	0.047535	0.5254	0.28539	0.023828
