# Supplementary material for: Tracking ‘transitional’ diadectomorphs in the earliest Permian of equatorial Pangea
Source: PeerJ. 2023 Dec 6;11:e16603. doi: 10.7717/peerj.16603 (PMC10710172; doi:10.7717/peerj.16603)
Supplement: Supplemental Information 3 — See the main text for abbreviations. [file peerj-11-16603-s003.xlsx]

## Sheet: Tracks parameters
Track parameters
Specimen	pI	pII	pIII	pIV	pV	mI	mII	mIII	mIV	mV	pL	pW	mL	mW
PM PAL113	23.41	30.68	38.8	46.24	27.53	18.78	26.16	31.87	36.7	22.4	104.6	105.45	76.08	95.13
MZM Ge33302	24.57	38.15	45.66	60.61	53.58	22.42	23.88	25.96	35.75	26.59 ?	121.51	133.12	93.49	138.06?
